# Supplementary material for: Elucidating the CO2 adsorption mechanisms in the triangular channels of the bis(pyrazolate) MOF Fe2(BPEB)3 by in situ synchrotron X-ray diffraction and molecular dynamics simulations
Source: Royal Society of Chemistry journal article supplement (doi:10.1039/c7ta04501h), 2017-01-01
Supplement: c7ta04501h1.pdf [file c7ta04501h1.pdf]

Electronic Supplementary Information for the Manuscript

**Elucidating the CO<sub>2</sub> adsorption mechanism in the  
triangular channels of the bis(pyrazolate) MOF  
Fe<sub>2</sub>(BPEB)<sub>3</sub> by *in-situ* synchrotron X-ray diffraction  
and molecular dynamics simulations**

*Carlotta Giacobbe,<sup>a,\*</sup> Elisa Lavigna,<sup>b</sup> Angelo Maspero<sup>b</sup> and Simona Galli<sup>b,c,\*</sup>*

<sup>a</sup>High-Resolution Powder-Diffraction Beamline, European Synchrotron Radiation Facility,

CS 40220, 38043 Grenoble Cedex 9, France.

<sup>b</sup>Dipartimento di Scienza e Alta Tecnologia, Università dell'Insubria,

Via Valleggio 11, 22100 Como, Italy.

<sup>c</sup>Consorzio Interuniversitario Nazionale per la Scienza e Tecnologia dei Materiali,

Via Giusti 9, 50121 Firenze, Italy.

\*Email - [carlotta.giacobbe@esrf.fr](mailto:carlotta.giacobbe@esrf.fr)

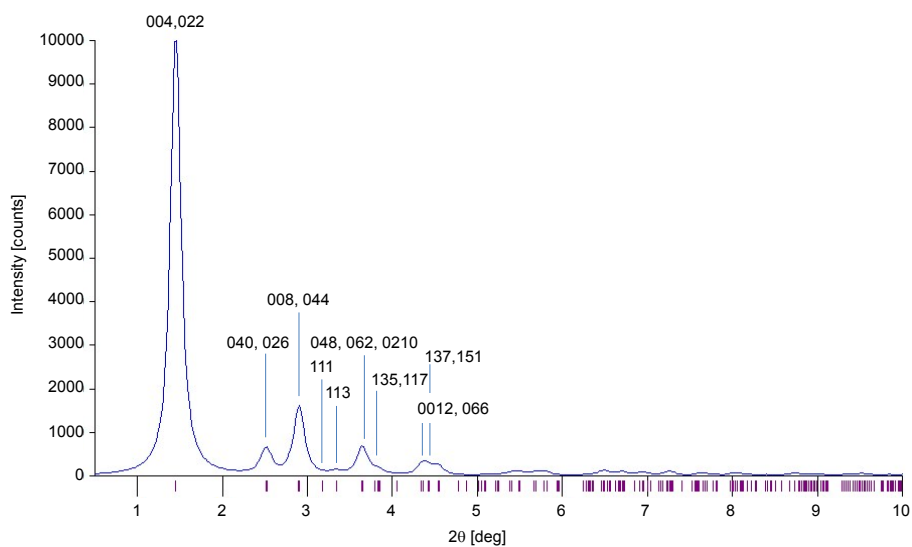

**Fig. S1.** Portion of the powder X-ray diffraction pattern calculated ( $\lambda = 0.400 \text{ \AA}$ ) for  $\text{Fe}_2(\text{BPEB})_3$  with the structural model proposed in reference 30 of the main text: a number of  $hkl$  Bragg reflections with  $h$  non zero are highlighted.

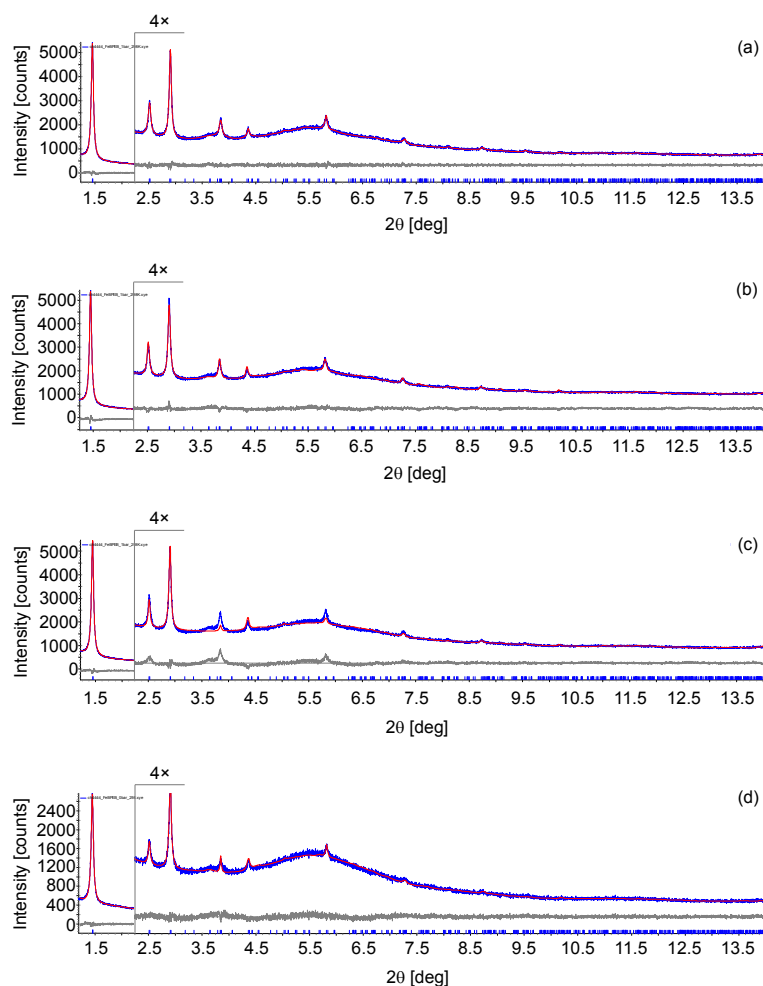

**Figure S2.** Representative examples of the HR-PXRD data treatment for  $\text{Fe}_2(\text{BPEB})_3$ : (a) Whole profile fitting of the data at 298 K and 1 bar of  $\text{CO}_2$  with the Le Bail approach ( $R_{\text{wp}} = 0.031$ ,  $R_{\text{p}} = 0.024$ ); (b) Rietveld refinement of the data at 298 K and 1 bar of  $\text{CO}_2$  with a structural model containing the three  $\text{CO}_2$  molecules ( $R_{\text{wp}} = 0.039$ ,  $R_{\text{p}} = 0.031$ ,  $R_{\text{Bragg}} = 0.86$ , for 43 parameters); (c) Rietveld refinement of the data at 298 K and 1 bar of  $\text{CO}_2$  with the structural model adopted in (b) but without the  $\text{CO}_2$  molecules ( $R_{\text{wp}} = 0.056$ ,  $R_{\text{p}} = 0.040$ ,  $R_{\text{Bragg}} = 1.45$ , for 22 parameters); (d) Rietveld refinement of the data at 298 K and 0 bar of  $\text{CO}_2$  with a structural model not containing guest molecules in the channels ( $R_{\text{wp}} = 0.038$ ,  $R_{\text{p}} = 0.030$ ,  $R_{\text{Bragg}} = 0.59$ , for 26 parameters). Experimental, calculated and difference curves are depicted in blue, red, and grey, respectively. The positions of the Bragg peaks are shown by blue markers at the bottom. Horizontal axis,  $2\theta$  [deg]; vertical axis, intensity [counts].

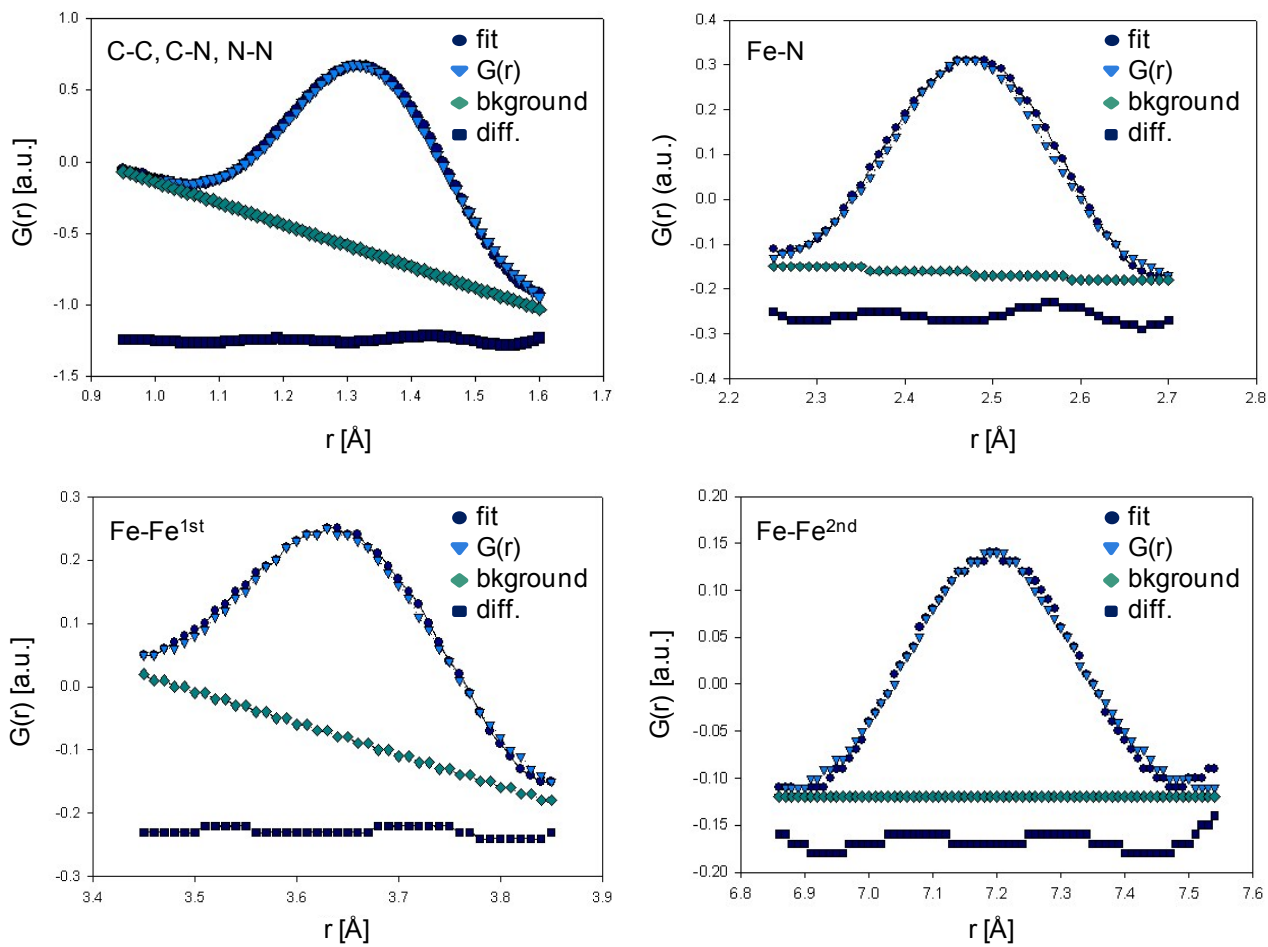

**Figure S3.** Gaussian fit of the main PDF peaks commented in the text. Fitting of the peaks extracted from the HE-PXRD data acquired at 298 K and 5 bar of  $\text{CO}_2$  is shown as a representative example.

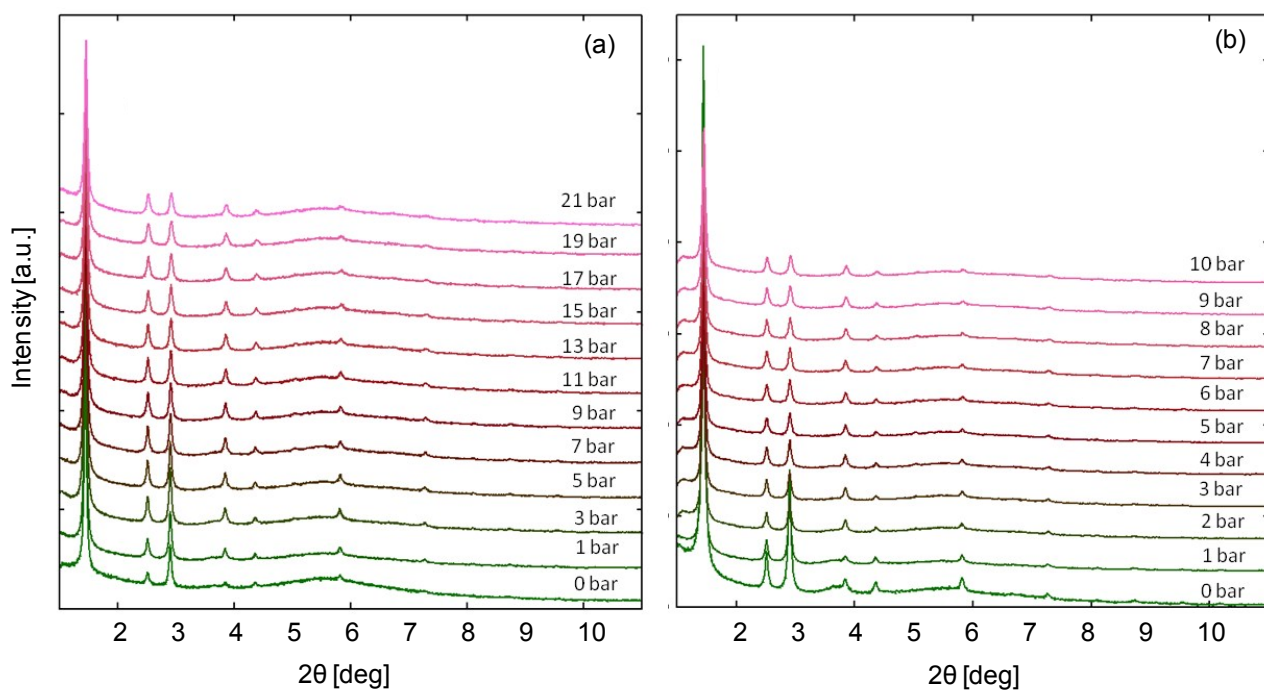

**Figure S4.** Comparison of the low-to-medium angle portion of the HR-PXRD patterns of  $\text{Fe}_2(\text{BPEB})_3$  acquired at (a) 298 K and (b) 273 K, at 0 bar of  $\text{CO}_2$  and all the  $\text{CO}_2$  loadings essayed at each temperature.

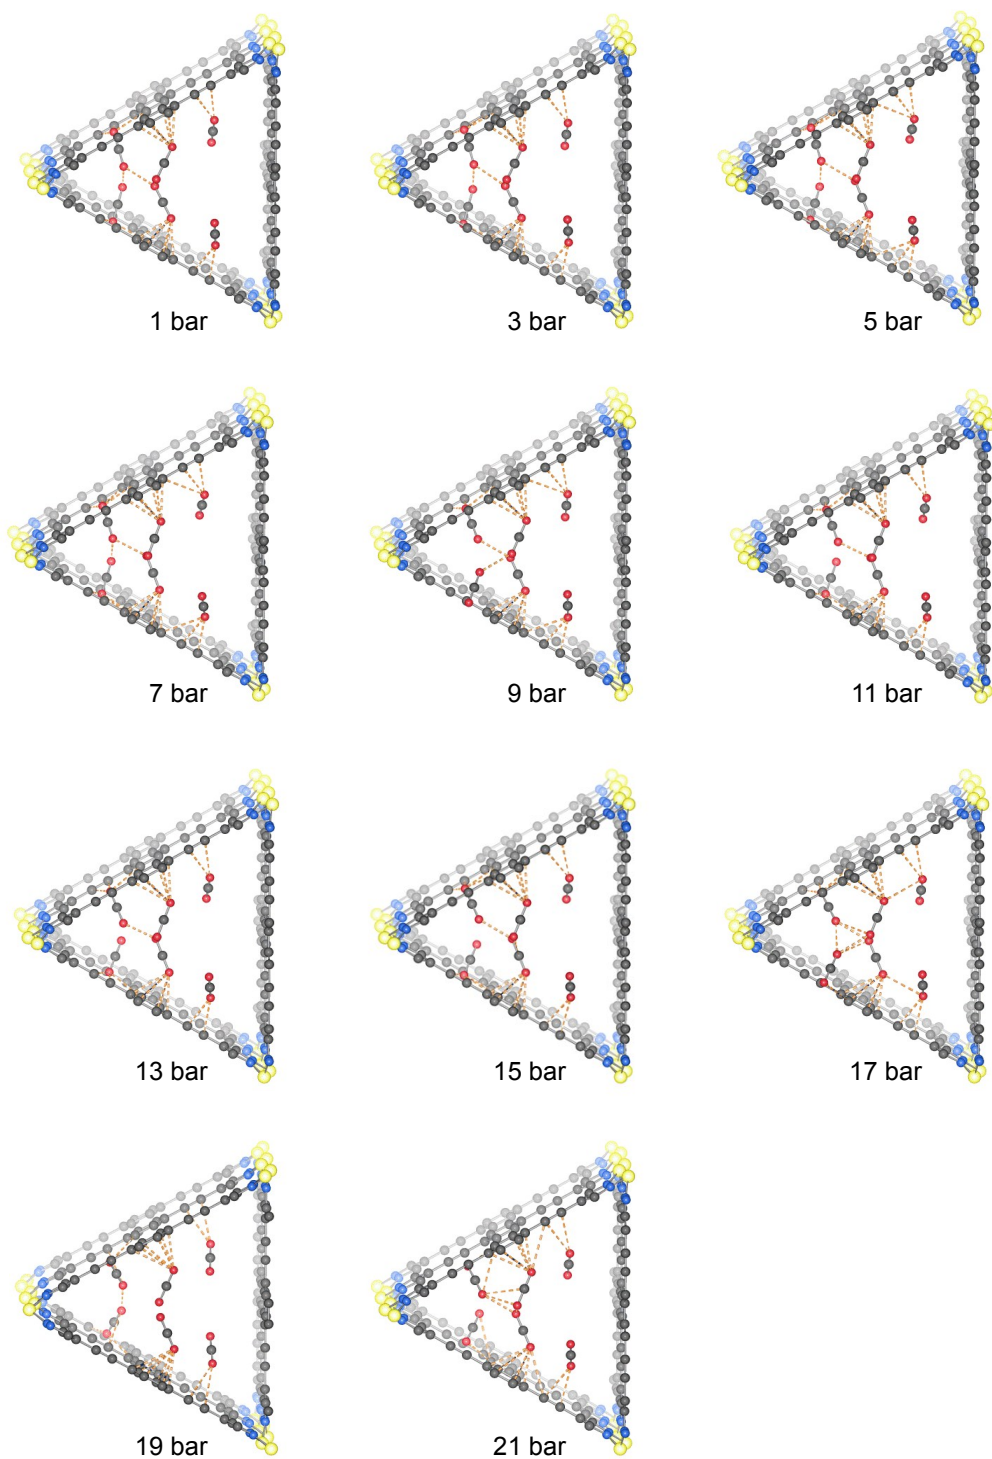

**Figure S5.** Location of the three independent CO<sub>2</sub> molecules [CO<sub>2</sub>-1, CO<sub>2</sub>-2, and CO<sub>2</sub>-3 in the text] in Fe<sub>2</sub>(BPEB)<sub>3</sub> at 298 K and CO<sub>2</sub> loadings in the range 1-21 bar. Depicted with fragmented lines the C···O host-guest and O···O guest-guest interactions. For the sake of clarity, only interactions shorter than 3.6 Å have been depicted.

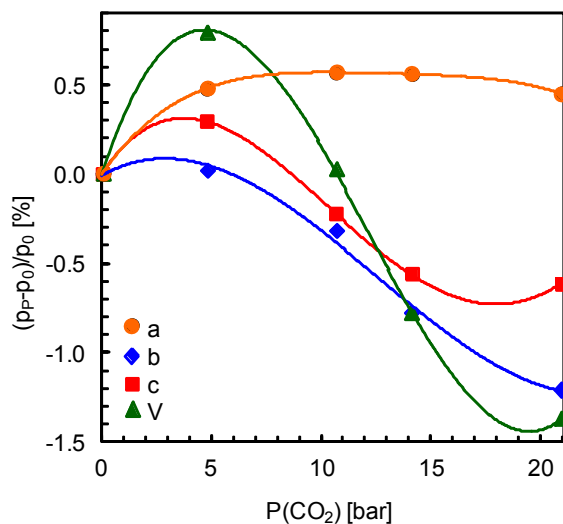

**Figure S6.** Percentage variation of the unit cell parameters  $p_p$  of  $\text{Fe}_2(\text{BPEB})_3$  as a function of the pressure of  $\text{CO}_2$  at 298 K, obtained by combining the results of the structureless Le Bail refinements and of the PDF analysis (see main text). The values of the parameters at each pressure have been normalized with respect to the values  $p_0$  shown prior to  $\text{CO}_2$  dosing.  $a$ -axis, orange circles;  $b$ -axis, blue diamonds;  $c$ -axis, red squares;  $V$ , green triangles. The lines have been added to guide the eye.

| 273 K               |          |       |  |  |  |  |
|---------------------|----------|-------|--|--|--|--|
| Le Bail Refinements |          |       |  |  |  |  |
| p [bar]             | $R_{wp}$ | $R_p$ |  |  |  |  |
| 0.0                 | 0.034    | 0.026 |  |  |  |  |
| 1.0                 | 0.030    | 0.023 |  |  |  |  |
| 2.0                 | 0.034    | 0.023 |  |  |  |  |
| 3.1                 | 0.028    | 0.022 |  |  |  |  |
| 3.9                 | 0.030    | 0.022 |  |  |  |  |
| 5.0                 | 0.029    | 0.022 |  |  |  |  |
| 5.7                 | 0.027    | 0.021 |  |  |  |  |
| 6.6                 | 0.026    | 0.020 |  |  |  |  |
| 7.3                 | 0.025    | 0.020 |  |  |  |  |
| 8.2                 | 0.025    | 0.020 |  |  |  |  |
| 8.7                 | 0.025    | 0.020 |  |  |  |  |

  

| 298 K               |          |       |                      |       |             |                   |
|---------------------|----------|-------|----------------------|-------|-------------|-------------------|
| Le Bail Refinements |          |       | Rietveld Refinements |       |             |                   |
| p [bar]             | $R_{wp}$ | $R_p$ | $R_{wp}$             | $R_p$ | $R_{Bragg}$ | # ref. parameters |
| 0                   | 0.033    | 0.025 | 0.038                | 0.030 | 0.588       | 26                |
| 1                   | 0.031    | 0.024 | 0.039                | 0.031 | 0.861       | 43                |
| 3                   | 0.030    | 0.023 | 0.038                | 0.030 | 0.795       | 45                |
| 5                   | 0.029    | 0.023 | 0.037                | 0.028 | 0.591       | 43                |
| 7                   | 0.029    | 0.023 | 0.037                | 0.028 | 0.596       | 45                |
| 9                   | 0.029    | 0.022 | 0.036                | 0.028 | 0.682       | 40                |
| 11                  | 0.029    | 0.022 | 0.036                | 0.028 | 0.784       | 40                |
| 13                  | 0.028    | 0.022 | 0.036                | 0.028 | 0.800       | 43                |
| 15                  | 0.028    | 0.022 | 0.036                | 0.028 | 0.609       | 43                |
| 17                  | 0.028    | 0.022 | 0.036                | 0.028 | 0.632       | 43                |
| 19                  | 0.028    | 0.022 | 0.036                | 0.028 | 0.641       | 43                |
| 21                  | 0.028    | 0.022 | 0.035                | 0.027 | 0.704       | 43                |

**Table S1.**  $R_{wp}$  and  $R_p$  figures of merit for all the Le Bail refinements carried out on the HR-PXRD data of  $\text{Fe}_2(\text{BPEB})_3$  at 273 and 298 K.  $R_{wp}$ ,  $R_p$  and  $R_{Bragg}$  figures of merit and number of refined parameters for all the Rietveld refinements carried out on the HR-PXRD data of  $\text{Fe}_2(\text{BPEB})_3$  at 298 K.



|         |                    | C       |         |        | O1      |         |        | O2      |         |        |
|---------|--------------------|---------|---------|--------|---------|---------|--------|---------|---------|--------|
| p [bar] |                    | x       | y       | z      | x       | y       | z      | x       | y       | z      |
| 1       | CO <sub>2</sub> -1 | 0.0182  | -0.1651 | 0.2572 | 0.0236  | -0.1928 | 0.2666 | 0.0601  | -0.1375 | 0.2477 |
|         | CO <sub>2</sub> -2 | 0.0511  | 0.1838  | 0.2902 | 0.0676  | 0.2156  | 0.2953 | 0.0345  | 0.1519  | 0.2852 |
|         | CO <sub>2</sub> -3 | -0.9163 | -0.5477 | 0.4346 | -0.0264 | -0.5723 | 0.4352 | -0.8061 | -0.5232 | 0.4341 |
| 3       | CO <sub>2</sub> -1 | 0.0150  | -0.1632 | 0.2579 | 0.0263  | -0.1919 | 0.2663 | 0.0564  | -0.1346 | 0.2494 |
|         | CO <sub>2</sub> -2 | 0.0388  | 0.1814  | 0.2882 | 0.0800  | 0.2124  | 0.2932 | -0.0024 | 0.1505  | 0.2831 |
|         | CO <sub>2</sub> -3 | -0.8842 | -0.5420 | 0.4359 | 0.0003  | -0.5655 | 0.4370 | -0.7687 | -0.5186 | 0.4347 |
| 5       | CO <sub>2</sub> -1 | 0.0170  | -0.1610 | 0.2590 | 0.0069  | -0.1914 | 0.2663 | 0.0409  | -0.1306 | 0.2517 |
|         | CO <sub>2</sub> -2 | 0.0202  | 0.1814  | 0.2887 | 0.0870  | 0.2104  | 0.2939 | -0.0466 | 0.1524  | 0.2835 |
|         | CO <sub>2</sub> -3 | 0.8521  | -0.5372 | 0.4382 | 0.0238  | -0.5586 | 0.4400 | -0.7281 | -0.5157 | 0.4363 |
| 7       | CO <sub>2</sub> -1 | 0.0245  | -0.1595 | 0.2607 | 0.0078  | -0.1904 | 0.2675 | 0.0412  | -0.1285 | 0.2539 |
|         | CO <sub>2</sub> -2 | 0.0033  | 0.1783  | 0.2864 | 0.0775  | 0.2066  | 0.2916 | -0.0710 | 0.1500  | 0.2813 |
|         | CO <sub>2</sub> -3 | -0.8587 | -0.5370 | 0.4375 | 0.0178  | -0.5586 | 0.4395 | -0.7352 | -0.5155 | 0.4354 |
| 9       | CO <sub>2</sub> -1 | 0.0102  | -0.1620 | 0.2631 | 0.0226  | -0.1917 | 0.2709 | 0.0430  | -0.1323 | 0.2553 |
|         | CO <sub>2</sub> -2 | -0.0313 | 0.1759  | 0.2850 | 0.0558  | 0.2020  | 0.2910 | -0.1185 | 0.1498  | 0.2789 |
|         | CO <sub>2</sub> -3 | -0.8430 | -0.5378 | 0.4355 | 0.0419  | -0.5614 | 0.4363 | -0.7279 | -0.5142 | 0.4347 |
| 11      | CO <sub>2</sub> -1 | 0.0370  | -0.1597 | 0.2627 | 0.0155  | -0.1904 | 0.2698 | 0.0586  | -0.1291 | 0.2557 |
|         | CO <sub>2</sub> -2 | -0.0168 | 0.1758  | 0.2844 | 0.0560  | 0.2038  | 0.2904 | -0.0896 | 0.1479  | 0.2785 |
|         | CO <sub>2</sub> -3 | -0.8839 | -0.5402 | 0.4370 | 0.0067  | -0.5621 | 0.4383 | -0.7610 | -0.5184 | 0.4357 |
| 13      | CO <sub>2</sub> -1 | 0.0202  | -0.1608 | 0.2644 | 0.0023  | -0.1915 | 0.2714 | 0.0426  | -0.1302 | 0.2573 |
|         | CO <sub>2</sub> -2 | -0.0559 | 0.1737  | 0.2835 | 0.0179  | 0.2011  | 0.2901 | -0.1297 | 0.1463  | 0.2768 |
|         | CO <sub>2</sub> -3 | -0.8800 | -0.5394 | 0.4370 | -0.0028 | -0.5613 | 0.4383 | -0.7573 | -0.5176 | 0.4356 |
| 15      | CO <sub>2</sub> -1 | 0.0282  | -0.1614 | 0.2645 | 0.0054  | -0.1919 | 0.2716 | 0.0510  | -0.1308 | 0.2573 |
|         | CO <sub>2</sub> -2 | -0.0553 | 0.1798  | 0.2849 | 0.0233  | 0.2062  | 0.2921 | -0.1339 | 0.1533  | 0.2778 |
|         | CO <sub>2</sub> -3 | -0.9656 | -0.5422 | 0.4331 | -0.0875 | -0.5643 | 0.4342 | -0.8437 | -0.5201 | 0.4321 |
| 17      | CO <sub>2</sub> -1 | 0.0126  | -0.1642 | 0.2674 | 0.0158  | -0.1943 | 0.2748 | 0.0410  | -0.1340 | 0.2600 |
|         | CO <sub>2</sub> -2 | -0.0874 | 0.1754  | 0.2825 | 0.0086  | 0.1992  | 0.2898 | -0.1835 | 0.1517  | 0.2751 |
|         | CO <sub>2</sub> -3 | -0.8830 | -0.5430 | 0.4334 | -0.0040 | -0.5653 | 0.4353 | -0.7621 | -0.5207 | 0.4334 |
| 19      | CO <sub>2</sub> -1 | 0.0107  | -0.1650 | 0.2678 | 0.0193  | -0.1950 | 0.2753 | 0.0407  | -0.1351 | 0.2603 |
|         | CO <sub>2</sub> -2 | -0.1013 | 0.1752  | 0.2828 | -0.0014 | 0.1982  | 0.2902 | -0.2012 | 0.1521  | 0.2755 |
|         | CO <sub>2</sub> -3 | -0.9286 | -0.5441 | 0.4332 | -0.0490 | -0.5666 | 0.4340 | -0.8083 | -0.5217 | 0.4325 |
| 21      | CO <sub>2</sub> -1 | 0.0085  | -0.1663 | 0.2689 | 0.0393  | -0.1963 | 0.2763 | 0.0224  | -0.1363 | 0.2615 |
|         | CO <sub>2</sub> -2 | -0.1258 | 0.1743  | 0.2821 | -0.0279 | 0.1978  | 0.2893 | -0.2238 | 0.1508  | 0.2748 |
|         | CO <sub>2</sub> -3 | -0.9171 | -0.5461 | 0.4332 | -0.0374 | -0.5686 | 0.4339 | -0.7969 | -0.5236 | 0.4324 |

**Table S2.** Fractional coordinates of the atoms of the three independent CO<sub>2</sub> molecules located in the channels of Fe<sub>2</sub>(BPEB)<sub>3</sub> at 298 K and different CO<sub>2</sub> loadings. The guest molecules were described as rigid bodies (see Experimental in the main text).
